# Supplementary material
Source: PubMed Central journal article supplement (PMC7184536)

# Sup Figure.1

a.

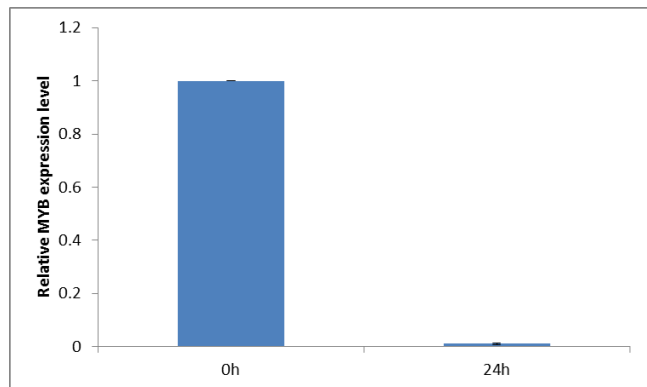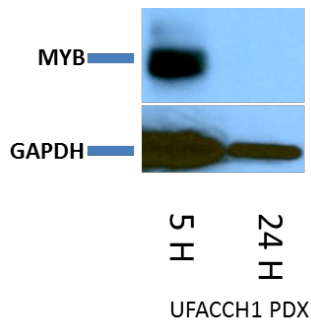

b.

| Modeling MYB-NFIB/Ink4a-Arf induced tumor model |             |                   |
|-------------------------------------------------|-------------|-------------------|
| Phenotype                                       | Age (month) | Number of animals |
| Lymphocytic leukemia                            | 8 to 13     | 10                |
| Testicular mass                                 | 6 to 10     | 4                 |
| Skin lesion                                     | 6 to 13     | 2                 |
| Undefined death                                 | 6 to 11     | 3                 |
| Breast tumor                                    | 7           | 1                 |

c.

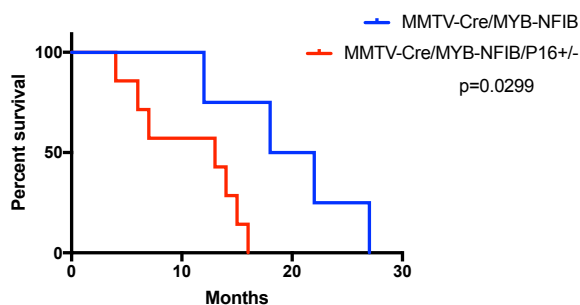

d.

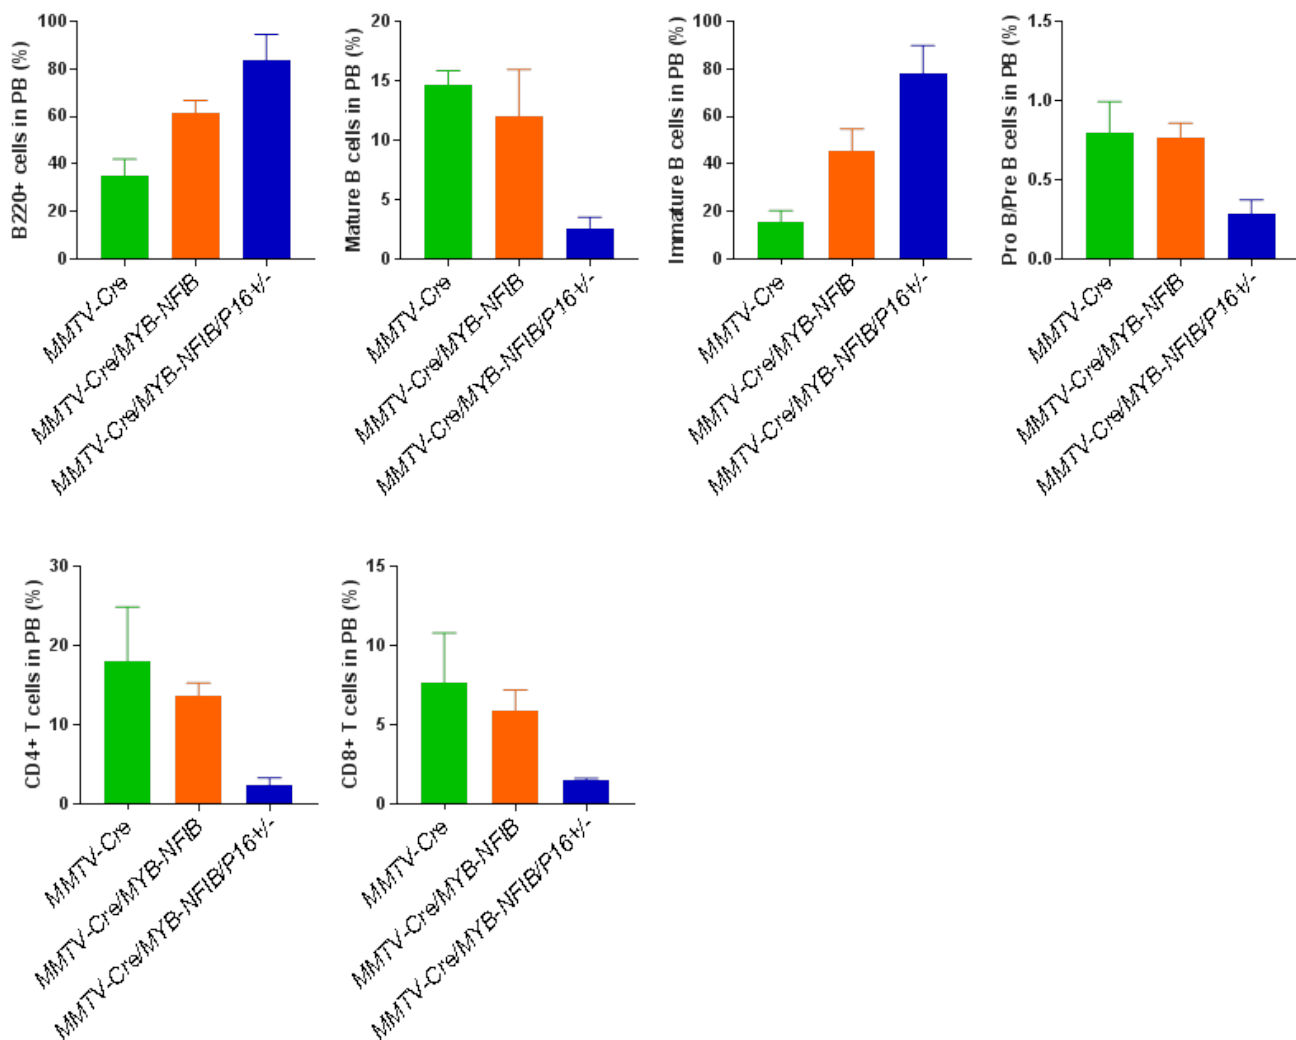

Supplement: NIHMS1578778-supplement-1.pdf [file NIHMS1578778-supplement-1.pdf]
