# Supplementary material
Source: PubMed Central journal article supplement (PMC7184536)

# Sup Figure.2

a MYB-NFIB/MMTV

MYB-NFIB/MMTV/P16+/-

MYB-NFIB/MMTV/P16+/-

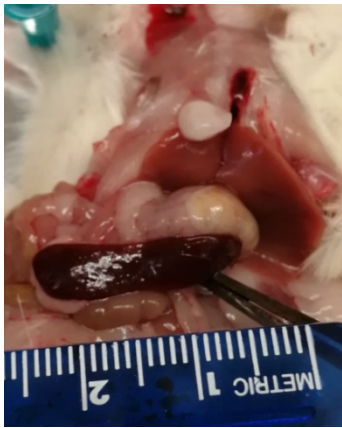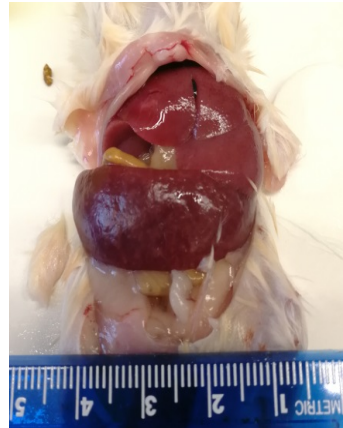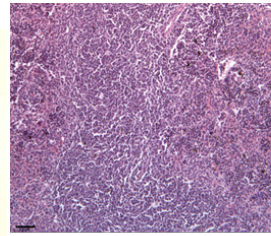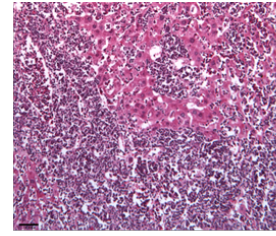

Spleen

Liver

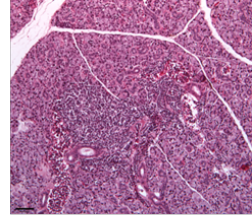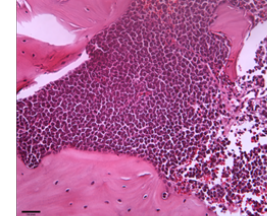

Salivary gland

Bone Marrow

b.

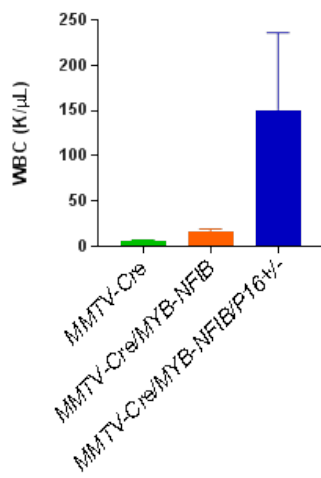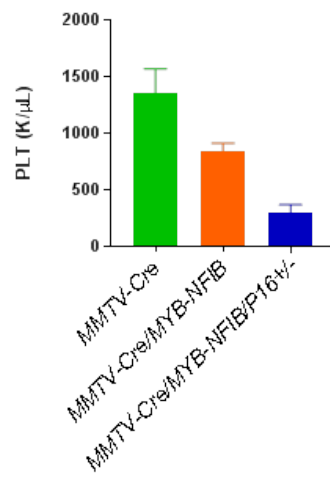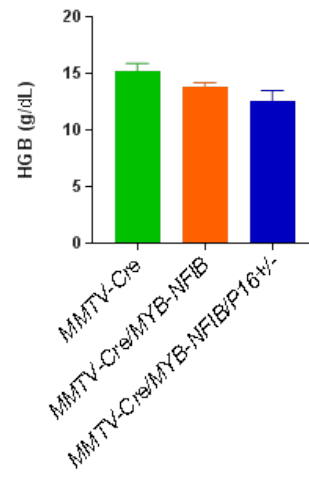

Supplement: NIHMS1578778-supplement-2.pdf [file NIHMS1578778-supplement-2.pdf]
